# Supplementary material for: HIV-1 molecular epidemiology and drug resistance-associated mutations among treatment-naïve blood donors in China
Source: PubMed Central journal article supplement (PMC7200736; doi:10.1038/s41598-020-64463-w), 2020-05-05
Supplement: 41598_2020_64463_MOESM1_ESM.pdf [file 41598_2020_64463_MOESM1_ESM.pdf]

HIV-1 molecular epidemiology and drug resistance-associated mutations among treatment-naïve blood donors in China

Junpeng Zhao<sup>1,2</sup>, Xiaoting Lv<sup>3</sup>, Le Chang<sup>1</sup>, Huimin Ji<sup>1,2</sup>, Barbara J Harris<sup>4</sup>, Lu Zhang<sup>1,2</sup>, Xinyi Jiang<sup>1,2</sup>, Fei Guo<sup>1</sup>, John Hackett Jr<sup>4</sup>, Peng Yin<sup>4</sup>, Gavin A Cloherty<sup>4</sup>, Mary A Rodgers<sup>4</sup>, Lunan Wang<sup>1,2\*</sup>

1 National Center for Clinical Laboratories, Beijing Hospital, National Center of Gerontology; Institute of Geriatric Medicine, Chinese Academy of Medical Sciences, P. R. China;

2 Graduate School, Peking Union Medical College, Chinese Academy of Medical Sciences, Beijing, P. R. China;

3 Abbott Laboratories, Research and Development, Shanghai, P.R. China;

4 Abbott Laboratories, Infectious Disease Research, Abbott Park, IL, USA.

\* Correspondence: Lunan Wang PhD, National Center for Clinical Laboratories, Beijing Hospital, No.1 Dahua Road, Beijing 100730, P. R. China.

Mobile: 13910098136    Tel: 010-85133609

Postal address: No.1 Dahua Road, Beijing Hospital, Beijing, P. R. China.

Postal code: 100730

Email: [lunan99@163.com](mailto:lunan99@163.com)

## Supplementary materials

Table S1. The sources of HIV-1 infected blood donors

| Geographic regions             | Provinces or municipalities | HIV-1 positive | <i>gag</i> sequenced | PR-RT sequenced | IN sequenced | <i>env</i> sequenced | DRMs |
|--------------------------------|-----------------------------|----------------|----------------------|-----------------|--------------|----------------------|------|
| North China                    | Beijing                     | 13             | 13                   | 13              | 13           | 13                   | 6    |
|                                | Heilongjiang                | 19             | 17                   | 19              | 17           | 15                   | 3    |
|                                | Liaoning                    | 11             | 11                   | 9               | 10           | 11                   | 0    |
|                                | Shanxi                      | 14             | 13                   | 12              | 14           | 14                   | 0    |
|                                | Inner Mongolia              | 1              | 1                    | 1               | 1            | 1                    | 0    |
|                                | Jilin                       | 11             | 10                   | 11              | 10           | 9                    | 2    |
|                                | Shaanxi                     | 29             | 26                   | 27              | 27           | 26                   | 2    |
|                                | Hebei                       | 1              | 1                    | 1               | 1            | 1                    | 0    |
|                                | Shandong                    | 2              | 2                    | 2               | 1            | 1                    | 0    |
| South China                    | Henan                       | 21             | 20                   | 20              | 21           | 21                   | 5    |
|                                | Hubei                       | 2              | 1                    | 1               | 2            | 2                    | 0    |
|                                | Jiangsu                     | 10             | 10                   | 9               | 9            | 9                    | 1    |
|                                | Guangdong                   | 10             | 9                    | 9               | 9            | 9                    | 4    |
| Northwestern District of China | Zhejiang                    | 1              | 1                    | 1               | 1            | 1                    | 0    |
|                                | Gansu                       | 1              | 1                    | 1               | 1            | 1                    | 0    |
| Qinghai-Tibet region           | Ningxia                     | 2              | 2                    | 2               | 2            | 2                    | 0    |
|                                | Chongqing                   | 31             | 30                   | 30              | 31           | 30                   | 5    |
| Total                          |                             | 179            | 168                  | 168             | 170          | 166                  | 28   |

Table S2. PCR and sequencing primers.

| Target region                                    | Primers                  |                        |                         |                             |                 |
|--------------------------------------------------|--------------------------|------------------------|-------------------------|-----------------------------|-----------------|
|                                                  | Reaction                 | Direction              | Name                    | Nucleotide sequence (5'-3') | Position (HXB2) |
| <i>gag</i>                                       | RT-PCR                   | Forward                | <i>gag</i> -F1          | AGACACCAARGAAGCYTTAG        | 1074-1093       |
|                                                  |                          | Reverse                | <i>gag</i> -R1          | CTTCYTTYCCACATTTCCAAC       | 2047-2027       |
|                                                  | Nested PCR               | Forward                | <i>gag</i> -F2          | GCYTTAGABAARRTAGAGGAAG      | 1087-1107       |
|                                                  |                          | Reverse                | <i>gag</i> -R2          | GGCTAKGTGYCCTTCYTTG         | 1995-1976       |
|                                                  | Sequencing               | Forward                | <i>gag</i> -F2          | GCYTTAGABAARRTAGAGGAAG      | 1087-1107       |
|                                                  |                          | Reverse                | <i>gag</i> -R2          | GGCTAKGTGYCCTTCYTTG         | 1995-1976       |
| Forward                                          |                          | <i>gag</i> -F3         | GTGAYATAGCAGGAACYACTAGT | 1490-1512                   |                 |
| PR-RT<br>(Protease,<br>Reverse<br>transcriptase) | RT-PCR                   | Forward                | RT-F1                   | ACTGARAGACAGGCYAATTTTTTAGGG | 2068-2094       |
|                                                  |                          | Reverse                | RT-R1                   | GTCTTTTGATGGGTCATAATAYRCTCC | 3521-3495       |
|                                                  | Nested PCR <sup>48</sup> | Forward                | RT-F2                   | CAGAGCCAACAGCCCCACC         | 2147-2165       |
|                                                  |                          | Reverse                | RT-R2                   | CTTCTGTATATCATTGACAGTCCAGCT | 3326-3300       |
|                                                  | Sequencing <sup>48</sup> | Forward                | RT-F2                   | CAGAGCCAACAGCCCCACC         | 2147-2165       |
|                                                  |                          | Reverse                | RT-R2                   | CTTCTGTATATCATTGACAGTCCAGCT | 3326-3300       |
|                                                  |                          | Forward                | RT-S-F1                 | GTTGACTCAGATTGGTTGCAC       | 2519-2539       |
|                                                  |                          | Forward                | RT-S-F2                 | CCTAGTATAAACAATGAGACAC      | 2946-2967       |
| Reverse                                          | RT-S-R1                  | GTGTCTCATTGTTTATACTAGG | 2967-2946               |                             |                 |
| IN (Integrase)                                   | RT-PCR                   | Forward                | IN-F1                   | TGGAGGRAATGAACAARTAGAT      | 4175-4196       |
|                                                  |                          | Reverse                | IN-R1                   | TGGGATRTGTACTTCTGAACTT      | 5214-5193       |
|                                                  | Nested PCR *             | Forward                | IN-F2                   | AACAAGTAGATAAATTAGTCAGT     | 4186-4208       |
|                                                  |                          | Reverse                | IN-R2                   | ATACATATGRTGTTTTACTAARCT    | 5130-5107       |
|                                                  | Sequencing *             | Forward                | IN-F2                   | AACAAGTAGATAAATTAGTCAGT     | 4186-4208       |
|                                                  |                          | Reverse                | IN-R2                   | ATACATATGRTGTTTTACTAARCT    | 5130-5107       |
| <i>env</i>                                       | RT-PCR *                 | Forward                | <i>env</i> -F-1         | TGARGGACAATTGGAGAARTGA      | 7648-7669       |
|                                                  |                          | Reverse                | <i>env</i> -R-1         | GGTGARTATCCCTKCCTAAC        | 8365-8346       |
|                                                  | Nested PCR *             | Forward                | <i>env</i> -F-2         | CAGCAGGWAGCACKATGGG         | 7798-7816       |
|                                                  |                          | Reverse                | <i>env</i> -R-1         | GGTGARTATCCCTKCCTAAC        | 8365-8346       |
|                                                  | Sequencing *             | Forward                | <i>env</i> -F-2         | CAGCAGGWAGCACKATGGG         | 7798-7816       |
|                                                  |                          | Reverse                | <i>env</i> -R-1         | GGTGARTATCCCTKCCTAAC        | 8365-8346       |

\*: The primers were presented by ABBOTT Laboratories.

Table S3. Genbank Accession numbers for reference sequences.

| Accession number | Classification | Accession number | Classification | Accession number | Classification |
|------------------|----------------|------------------|----------------|------------------|----------------|
| X52154           | SIV            | KC870030         | CRF65_cpx      | U63632           | B              |
| AF197340         | CRF01_AE       | KC183779         | CRF67_01B      | M17451           | B              |
| U51188           | CRF01_AE       | KC183780         | CRF67_01B      | AY173951         | B              |
| AF197341         | CRF01_AE       | KX673818         | CRF77_cpx      | U21135           | B              |
| U54771           | CRF01_AE       | KX673819         | CRF77_cpx      | U52953           | C              |
| AJ286133         | CRF02_AG       | KX673820         | CRF77_cpx      | AF067155         | C              |
| AF063224         | CRF02_AG       | KU161143         | CRF78_cpx      | AF110967         | C              |
| L39106           | CRF02_AG       | KU161144         | CRF78_cpx      | U46016           | C              |
| AF107770         | CRF02_AG       | KU161145         | CRF78_cpx      | AY772699         | C              |
| AJ288982         | CRF06_cpx      | KY216146         | CRF79_0107     | AY371157         | D              |
| AJ245481         | CRF06_cpx      | KY216147         | CRF79_0107     | U88822           | D              |
| AJ288981         | CRF06_cpx      | KY216148         | CRF79_0107     | U88824           | D              |
| AF064699         | CRF06_cpx      | KU820834         | CRF83_cpx      | K03454           | D              |
| AF286226         | CRF07_BC       | KU820842         | CRF83_cpx      | M27323           | D              |
| AF286230         | CRF07_BC       | KU820843         | CRF83_cpx      | AY253311         | D              |
| AX149647         | CRF07_BC       | KU820847         | CRF83_cpx      | AF005494         | F1             |
| AF286229         | CRF08_BC       | KU992928         | CRF85_BC       | AF075703         | F1             |
| AY008715         | CRF08_BC       | KU992929         | CRF85_BC       | AJ249238         | F1             |
| AY008716         | CRF08_BC       | KU992930         | CRF85_BC       | AF077336         | F1             |
| AY008717         | CRF08_BC       | AF484509         | A1             | AY371158         | F2             |
| AF516184         | CRF15_01B      | AB253429         | A1             | AF377956         | F2             |
| AF529572         | CRF15_01B      | AF004885         | A1             | AJ249236         | F2             |
| AF529573         | CRF15_01B      | AF069670         | A1             | AJ249237         | F2             |
| AF530576         | CRF15_01B      | M62320           | A1             | U88826           | G              |
| AY945734         | CRF52_01B      | AF286237         | A2             | AF084936         | G              |
| DQ354113         | CRF52_01B      | AF286238         | A2             | AF061641         | G              |
| DQ366664         | CRF52_01B      | AY521629         | A3             | AF061642         | G              |
| JX574661         | CRF55_01B      | AY521630         | A3             | AF005496         | H              |
| JX574662         | CRF55_01B      | AY521631         | A3             | AF190127         | H              |
| JX574663         | CRF55_01B      | AM000055         | A4             | AF190128         | H              |
| JX960635         | CRF59_01B      | AM000053         | A4             | AF082395         | J              |
| KC462190         | CRF59_01B      | AM000054         | A4             | AF082394         | J              |
| KC462191         | CRF59_01B      | AY331295         | B              | AJ249235         | K              |
| KC870027         | CRF65_cpx      | AY423387         | B              | AJ249239         | K              |
| KC870028         | CRF65_cpx      | K03455           | B              |                  |                |

Fig S1

From: HIV-1 molecular epidemiology and drug resistance-associated mutations among treatment-naïve blood donors in China

a

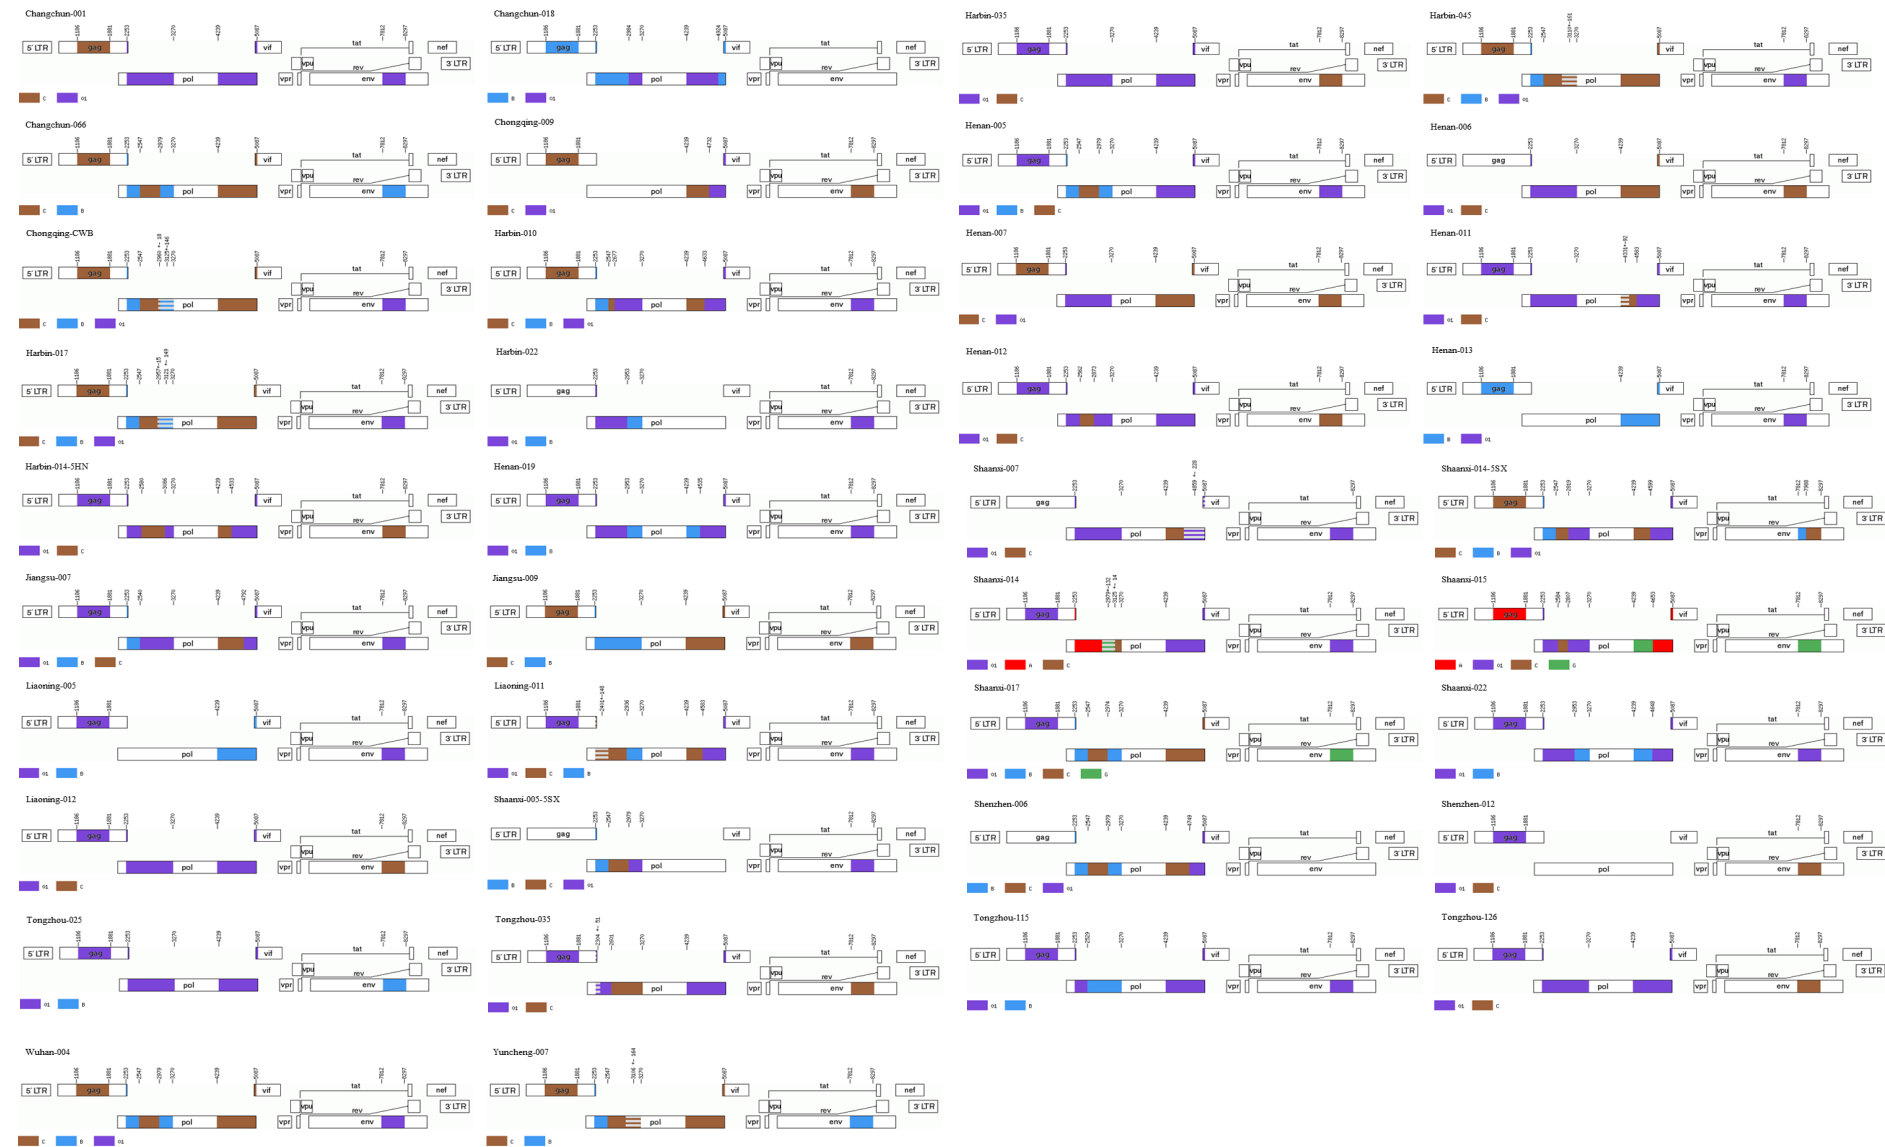

The genome maps of URFs. (a) 39 HIV-1 isolates were identified as URFs.

Fig S2

From: HIV-1 molecular epidemiology and drug resistance-associated mutations among treatment-naïve blood donors in China

a

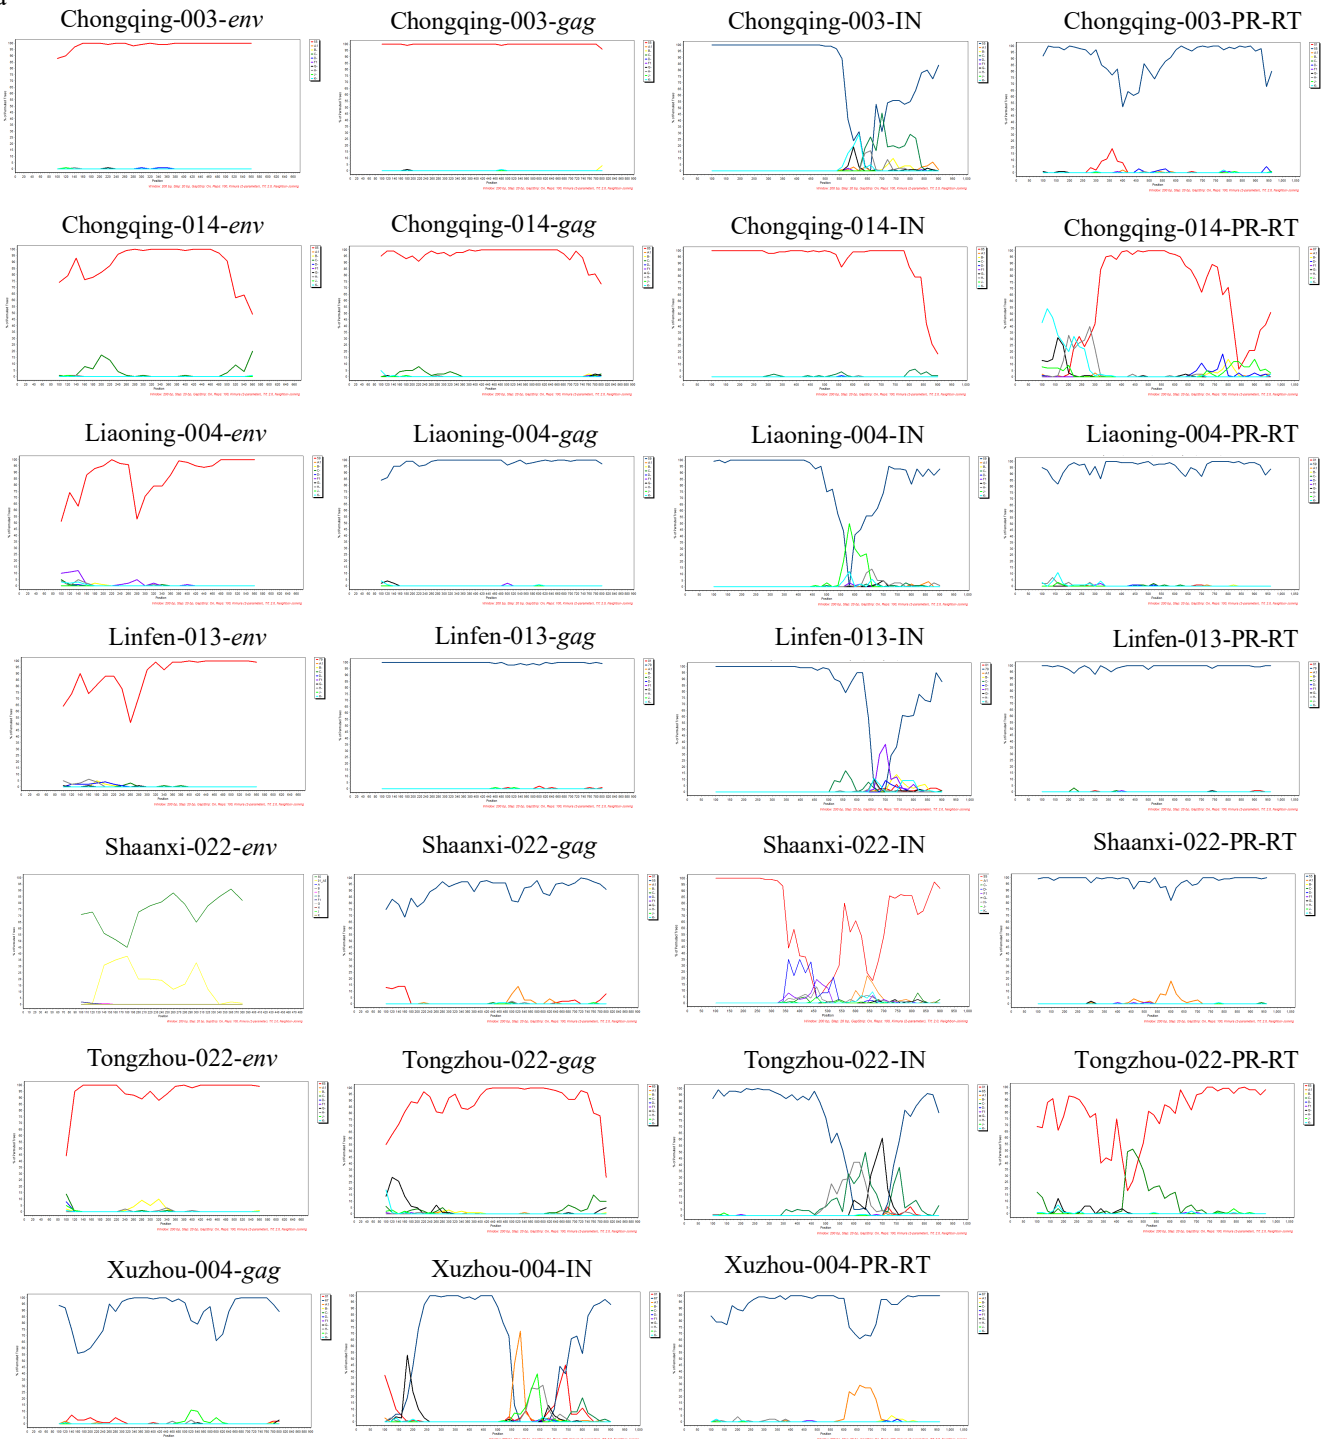

Bootscan plots of the 7 rare recombinant partial-genome sequences from the HIV-1 infected blood donors. (a) 7 HIV-1 isolates were identified as rare CRFs in China, *env*, *gag*, IN and PR-RT sequences among these strains were performed on bootscan analysis. Each bootscan plot was performed with Kimura-2 model of nucleotide substitution with a window size of 200 and a step size of 20. The color-coded key represents the different subtypes, sub-subtypes and CRFs of HIV-1. Subtype classification: Chongqing-003 (CRF55\_01B), Chongqing-014 (CRF85\_BC), Liaoning-004 (CRF59\_01B), Linfen-013 (CRF79\_0107), Shaanxi-022 (CRF55\_01B), Tongzhou-022 (CRF65\_cpx), Xuzhou-004 (CRF67\_01B).

a

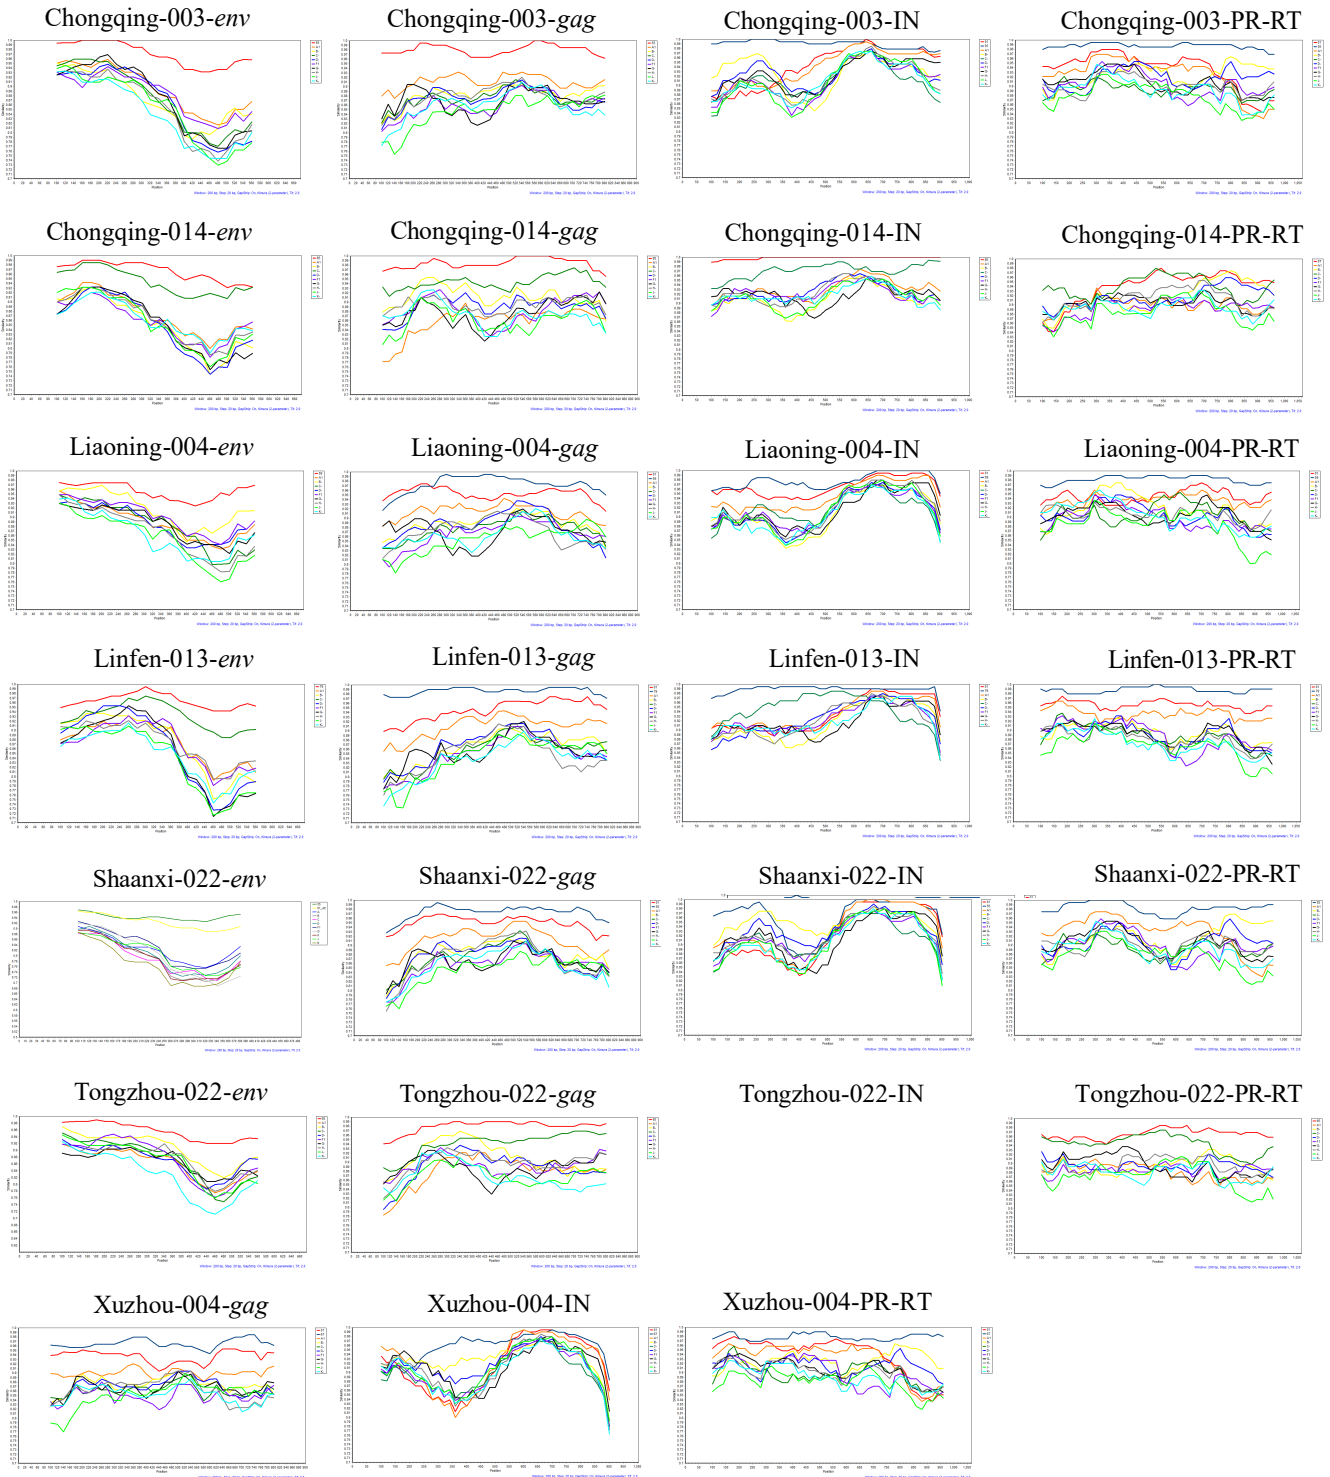

Similarity plots of the 7 rare recombinant partial-genome sequences from the HIV-1 infected blood donors. (a) 7 HIV-1 isolates were identified as rare CRFs in China, *env*, *gag*, IN and PR-RT sequences among these strains were performed on similarity analysis. Each similarity plot was performed with Kimura-2 model of nucleotide substitution with a window size of 200 and a step size of 20. The color-coded key represents the different subtypes, sub-subtypes and CRFs of HIV-1. Subtype classification: Chongqing-003 (CRF55\_01B), Chongqing-014 (CRF85\_BC), Liaoning-004 (CRF59\_01B), Linfen-013 (CRF79\_0107), Shaanxi-022 (CRF55\_01B), Tongzhou-022 (CRF65\_cpx), Xuzhou-004 (CRF67\_01B).

Fig S4

From: HIV-1 molecular epidemiology and drug resistance-associated mutations among treatment-naïve blood donors in China

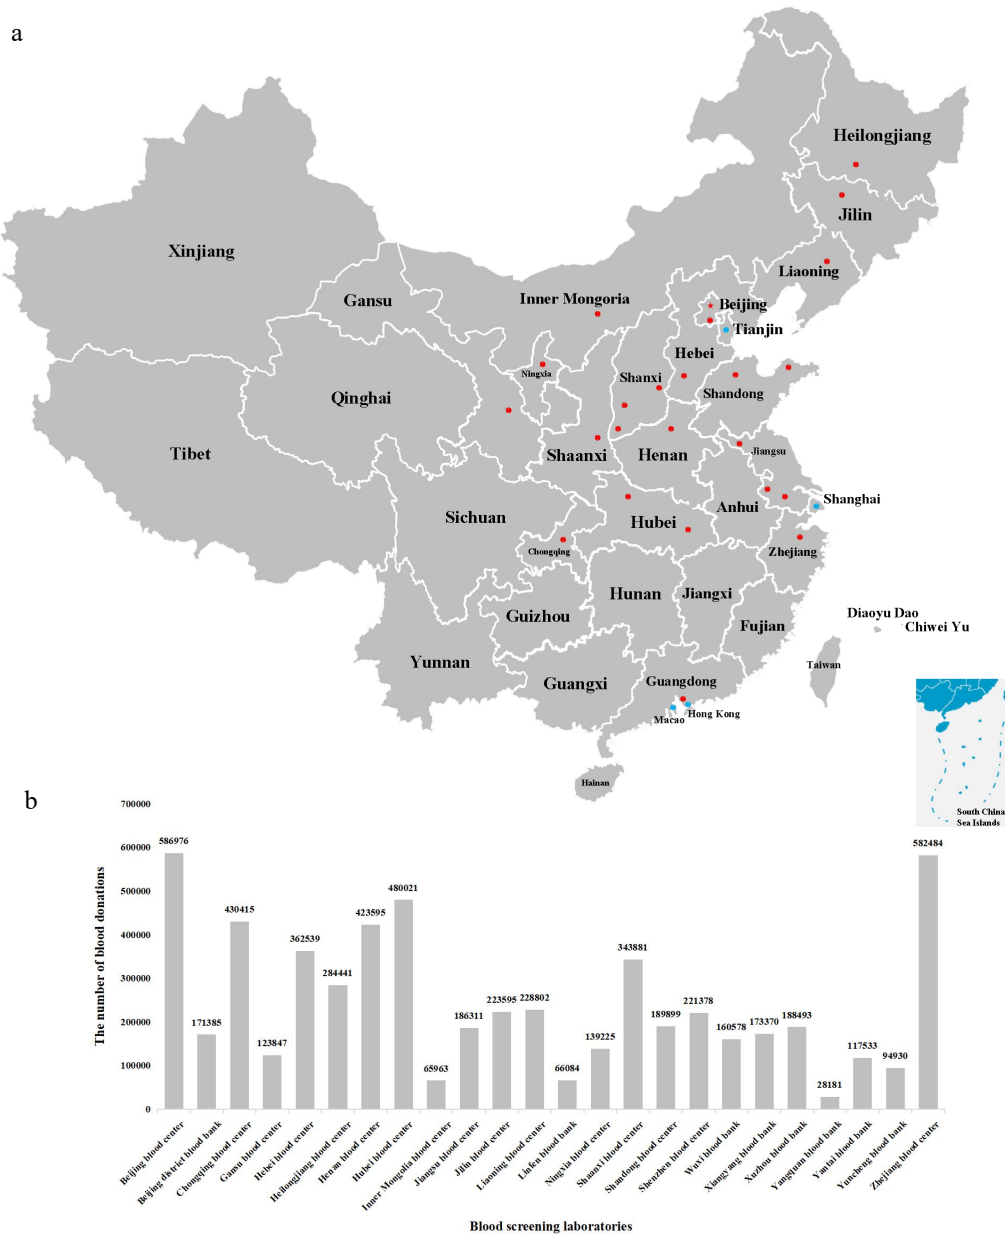

Geographical localization of blood screening laboratories in the study and the number of blood donations screened in these laboratories from January 2016 to December 2017. (a) 24 blood banks or blood centers were represented by red circles and pentagram. (b) The number of blood donations collected by the 24 blood screening laboratories.
